# Supplementary material for: Synthesis of silver nanoparticles in a microfluidic coaxial flow reactor
Source: Royal Society of Chemistry journal article supplement (doi:10.1039/c5ra17466j), 2015-01-01
Supplement: c5ra17466j1.pdf [file c5ra17466j1.pdf]

### Supplementary Information

#### **Synthesis of silver nanoparticles in microfluidic coaxial flow reactors**

Razwan BABER<sup>1</sup>, Luca MAZZEI<sup>1</sup>, Nguyen TK THANH<sup>2,3</sup>, Asterios GAVRIILIDIS<sup>1,\*</sup>

<sup>1</sup> Department of Chemical Engineering, University College London, UK

<sup>2</sup> UCL Healthcare Biomagnetic and Nanomaterials Laboratories

<sup>3</sup> Biophysics Group, Department of Physics and Astronomy, University College London, UK

\* Corresponding author: a.gavriilidis@ucl.ac.uk

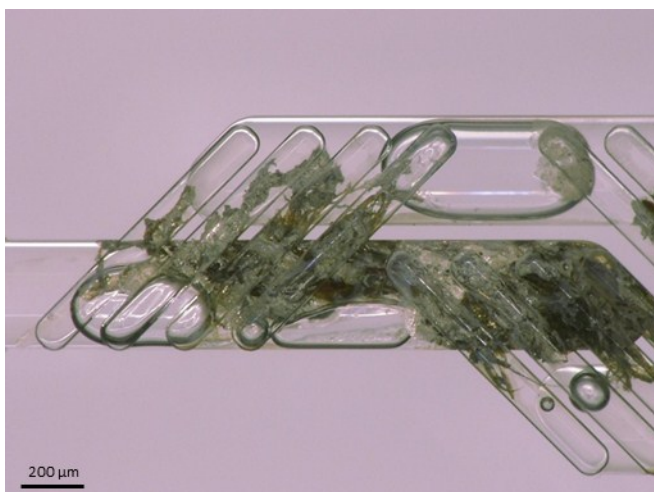

**Fig. S1:** Microscope image showing the fouling of the channel in a split and recombine micromixer after synthesis of silver nanoparticles using silver nitrate, sodium borohydride and trisodium citrate.

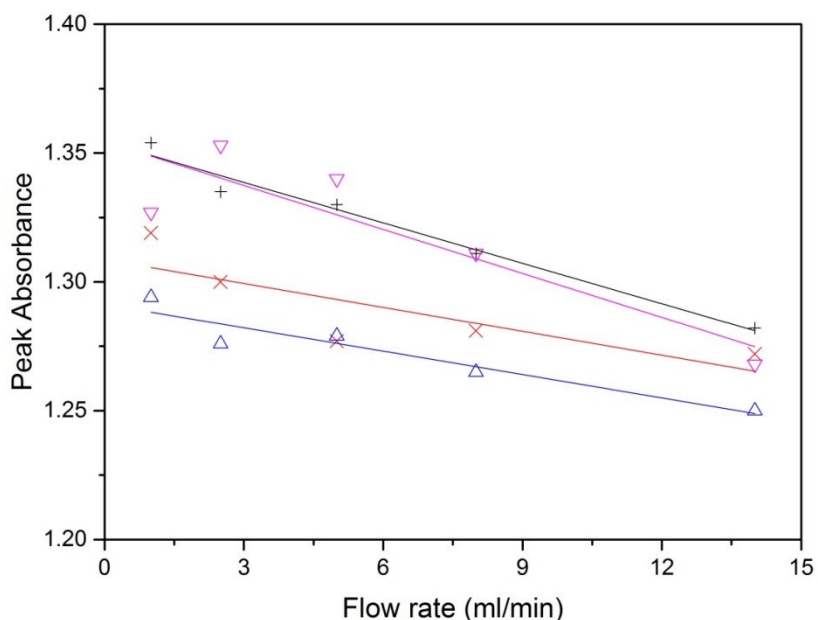

**Fig. S2:** Peak absorbance of silver NPs synthesised at various total flow rates in the range 1-14 ml/min. Synthesis was repeated four times for each flow rate. Concentrations of silver nitrate 0.2 mM, trisodium citrate 0.2 mM, sodium borohydride 0.3 mM. 0.798 mm inner tube I.D.

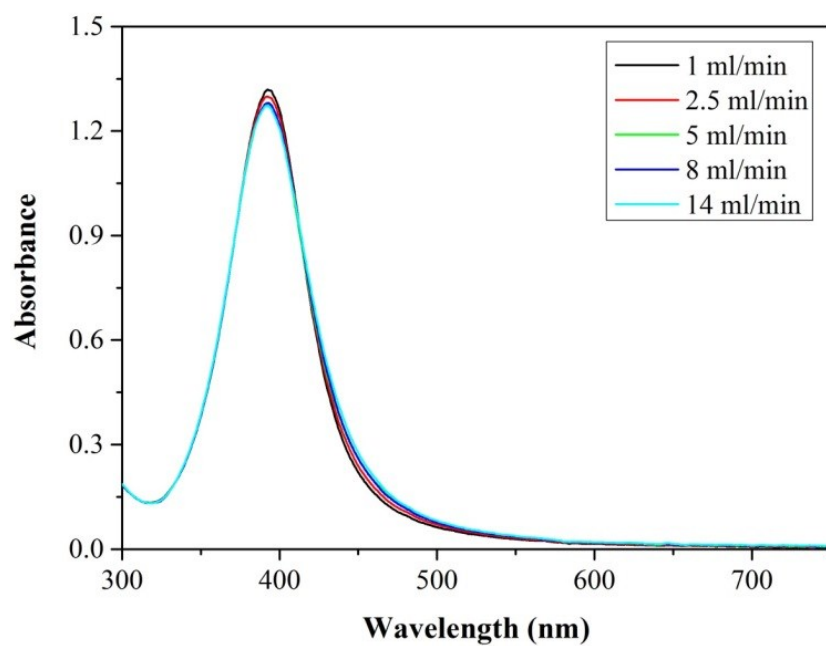

**Fig. S3:** UV-vis spectra of silver NPs synthesised at various total flow rates in the range 1-14 ml/min. Concentrations of silver nitrate 0.2 mM, trisodium citrate 0.2 mM, sodium borohydride 0.3 mM. 0.798 mm inner tube I.D.

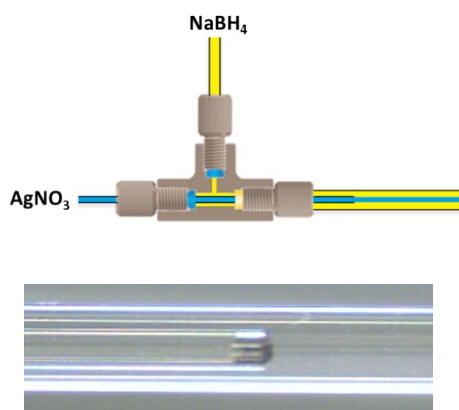

**Fig. S4:** Fouling on the inner wall of the inner tube when silver nitrate solution flowed through the inner tube

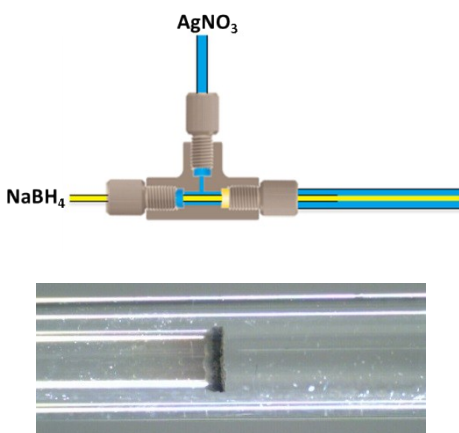

**Fig. S5:** Fouling on the outer wall of the inner tube when silver nitrate solution flowed through the outer tube
